# Supplementary material for: Enhanced sinterability and electrochemical performance of solid oxide fuel cellsviaa roll calendering process
Source: Royal Society of Chemistry journal article supplement (doi:10.1039/c9ta01818b), 2019-01-01
Supplement: c9ta01818b1.pdf [file c9ta01818b1.pdf]

## Supporting information on:

### Enhanced sinterability and electrochemical performance of solid oxide fuel cells via roll calendaring process

**Junseok Kim<sup>1,2</sup>, Junsung Ahn<sup>1,3</sup>, Jisu Shin<sup>1</sup>, Kyung Joong Yoon<sup>1</sup>, Ji-Won Son<sup>1,4</sup>,**

**Jong-Ho Lee<sup>1,4</sup>, Dongwook Shin<sup>2</sup>, Hae-Weon Lee,<sup>1</sup> and Ho-Il Ji<sup>1,4\*</sup>**

<sup>1</sup>Center for Energy Materials Research, Korea Institute of Science and Technology (KIST), Seoul 02792, Republic of Korea

<sup>2</sup>Division of Materials Science and Engineering, Hanyang University, Seoul 04763, Republic of Korea

<sup>3</sup>Department of Materials Science and Engineering, Research Institute of Advanced Materials, Seoul National University, Seoul 08826, Republic of Korea

<sup>4</sup>Nanomaterials Science and Engineering, Korea University of Science and Technology (UST), KIST Campus, Seoul 02792, Republic of Korea

\*Corresponding author.

E-mail address: [hiji@kist.re.kr](mailto:hiji@kist.re.kr) (H.-I. Ji)

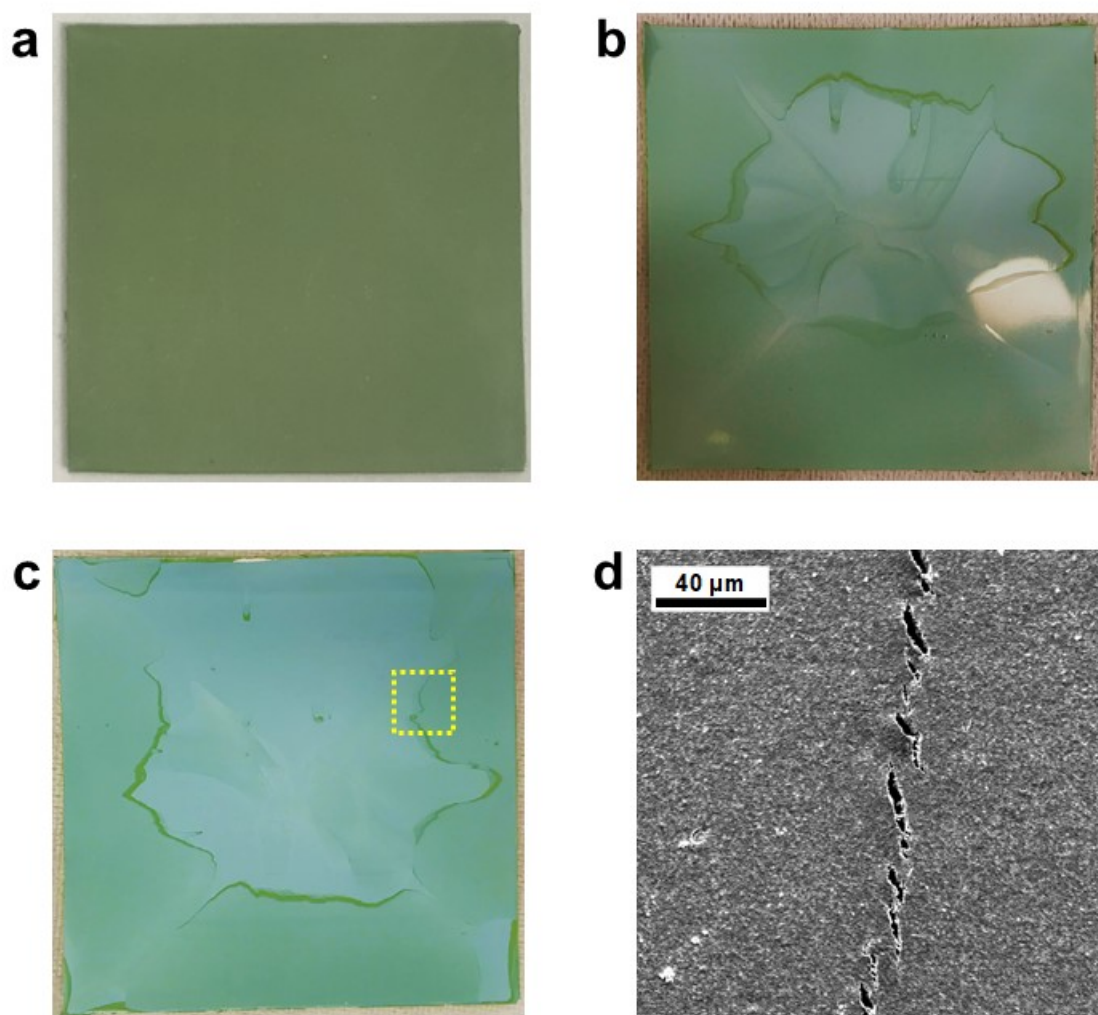

**Figure S1.** (a-c) Top views of the actual cell before (a) and after lamination using the uniaxial press with pressures of 16 MPa (b) and 18 MPa (c), respectively. (d) Microstructure of the region corresponding to the area marked by the yellow square in (c).

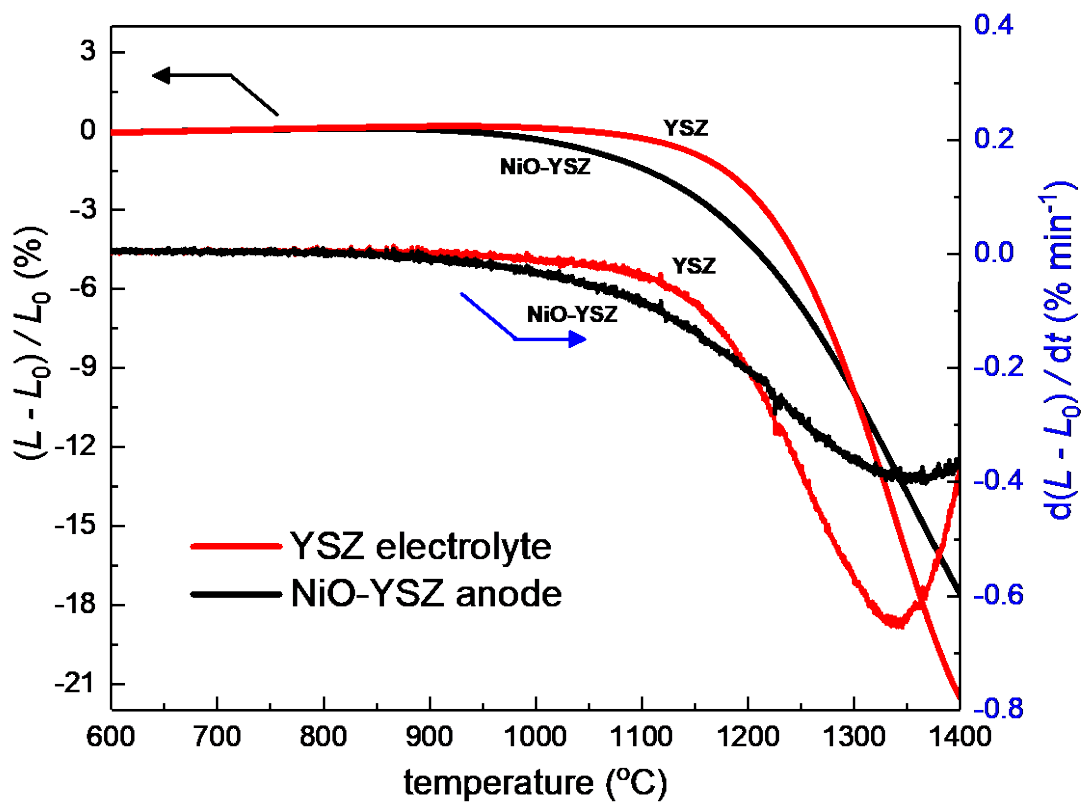

**Figure S2.** Linear shrinkages ( $L$ ) and their rates of the NiO-YSZ composite anode (black) and YSZ electrolyte (red).

**Table S1.** Offset (ohmic) and electrochemical reaction (polarization) resistances of roll calendering cell (sintered at 1270°C) and uniaxial press cell (sintered at 1350°C) at various temperatures, respectively. The values are extracted from the impedance spectra shown in Figure 7.

| Temperature<br>(°C) | Roll calendering cell                            |                                                         | Uniaxial press cell                              |                                                         |
|---------------------|--------------------------------------------------|---------------------------------------------------------|--------------------------------------------------|---------------------------------------------------------|
|                     | Ohmic<br>Resistance<br>( $\Omega \text{ cm}^2$ ) | Polarization<br>resistance<br>( $\Omega \text{ cm}^2$ ) | Ohmic<br>resistance<br>( $\Omega \text{ cm}^2$ ) | Polarization<br>resistance<br>( $\Omega \text{ cm}^2$ ) |
| 800                 | 0.100                                            | 0.650                                                   | 0.178                                            | 1.117                                                   |
| 750                 | 0.117                                            | 0.876                                                   | 0.213                                            | 1.542                                                   |
| 700                 | 0.152                                            | 1.411                                                   | 0.268                                            | 1.952                                                   |
